# Supplementary material for: Disrupted Dorsal Mid-Insula Activation During Interoception Across Psychiatric Disorders
Source: Atypon-hosted journal article supplement (doi:10.1176/appi.ajp.2020.20091340), 2021-06-22
Supplement: appi.ajp.2020.20091340.ds001.pdf [file appi.ajp.2020.20091340.ds001.pdf]

## Supplemental materials

### Disrupted dorsal mid-insula activation during interoception across psychiatric disorders

#### 1. *Additional details on record inclusion criteria*

See **Table S1** for study details including interoceptive domain, contrast, and clinical category. Criterion 1 (interoception) was established according to previously published definitions of interoception (1, 2) : a sensing of the physiological condition or state of the body, including tickle, itch, skin temperature, hunger, thirst, heat, pain, and organ integrity. According to this definition, proprioceptive signals or any signals relating to sensing the outside environment through touch, taste, smell, sight, or hearing are not interoception. While many exteroceptive tasks studied in neuroimaging experiments may have interoceptive components (for example, viewing violent images could evoke visceral nausea), we included only tasks where the neuroimaging contrast itself was explicitly interoceptive, in an attempt to minimise the contribution of other neural systems to our results (in the same example, a contrast of violent and neutral images would evoke various exteroceptive sensations in addition to any interoceptive components).

In line with the transdiagnostic motivation behind our analysis, Criterion 2 (clinical group) was intended to capture an inclusive array of mental health problems, and included (for example) patients diagnosed with psychiatric disorders, patients with high levels of a clinically-significant trait (e.g. problem substance use; high anxiety), and recovered or weight-restored patients with anorexia nervosa. However, we excluded chronic pain and functional bowel disorders unless the patients were segregated according to a psychiatric measure (e.g. somatisation). Our clinical disorder keyword list was reviewed and finalized by a PhD-level clinical psychologist (Dalglish) prior to searches.

The full electronic search strategy for PubMed/MEDLINE (which can also be found on our preregistered protocol) combined (MRI OR "SPECT" OR "positron emission") with ("task" or "functional") via the Boolean operator AND.

These terms were then combined with our clinical search terms via AND: (Psychiatric OR "Mood Disorder" OR Depress\* OR Dysphori\* OR Dysthymi\* OR Bipolar OR Mania OR Manic OR Schiz\* OR Psychosis OR Psychotic OR Delusional OR Paranoid OR Anxiety OR "Post traumatic stress disorder" OR PTSD OR Posttraumatic stress disorder OR Post-traumatic stress disorder OR "Acute stress disorder" OR Agoraphobia OR Phobia OR Panic OR "Obsessive compulsive" OR OCD OR Hoarding OR "Eating disorder" OR Anorexia OR Bulimia OR Binge eating OR Body dysmorphic OR Personality disorder OR Borderline OR Antisocial OR Narcissistic OR Histrionic OR Dependent OR Somatoform OR Somatic OR Substance use disorder OR Substance abuse OR Substance dependence OR Addiction OR Dependence OR oppositional defiant OR intermittent explosive OR sexual dysfunction)

Finally, the neuroimaging and clinical search terms were combined with interoceptive terms using the Boolean AND operator: (Intercept\* OR “Visceral perception” OR “Heartbeat detection” OR “Affective touch” OR nocicepti\* OR tickle OR thirst OR hunger OR “vasomotor flush” OR itch)

## 2. *Exploratory analyses of disorder groupings and hypo- and hyper-activation*

After conducting our primary analysis (see **Table S2**; **Table S3** for uncorrected results), for completeness only, we conducted a series of follow-up exploratory analyses. We first conducted an exploratory analysis to examine if the result was driven by foci representing hypo- (patients<controls; 97 foci) or hyper-activation (patients>controls; 180 foci). No clusters survived statistical correction (see **Table S4** for uncorrected results).

Next, again for completeness only, we disaggregated studies into three disorder groupings. Groupings were: substance use (K=9), encompassing substance use disorder (SUD) and problem substance use (PSU); eating disorders (K=13), encompassing remitted anorexia nervosa (rAN), anorexia nervosa (AN), remitted bulimia nervosa (rBN), and bingeing; affective and stress-related disorders (K=9), encompassing major depressive disorder (MDD), generalised anxiety disorder (GAD), post-traumatic stress disorder (PTSD), panic disorder (PD), low-resilience to stress/adversity (measured using the Connor-Davidson Resilience Scale), high anxiety (measured using the Anxiety Sensitivity Index); the two studies including patients with schizophrenia were not included in this follow-up analysis. Studies were categorised according to general clinical category (3), but note that some did not map on to distinct psychiatric diagnoses (e.g., low resilience to adversity); nevertheless, this study met our preregistered inclusion criteria according to both raters (“clinically-relevant traits”), and was therefore included.

In this exploratory analysis, only the affective disorders subgroup showed clusters surviving statistical correction: the left dorsal mid-insula ( $Z=5.08$ ,  $p=0.00000019$ , peak: -36, -2, 14,  $Z=5.08$ ; volume:  $784\text{mm}^3$ ) and the left entorhinal/perirhinal cortex ( $Z=5.46$ ,  $p=0.000000024$ ; peak: -20-18, -16,  $Z=5.46$ ; volume:  $784\text{mm}^3$ ). However, this should not be strongly interpreted due to the lack of power in all disorder subgroups. See **Table S5** for uncorrected results.

A chi-squared test revealed that certain interoceptive domains were measured more in some clinical categories than others ( $\chi^2=35.72$ ,  $p=0.003$ ), such that studies investigating eating disorders (rAN, rBN, and AN) were most likely to have measured hunger-related processes (6 out of 12 eating disorder studies), studies investigating substance use (SUD and PSU) were most likely to have used a breathing load task (5 out of 9 SUD studies), and those in patients with affective disorders were most likely to have investigated pain processing (5 out of 9 affective disorder studies).

## 3. *Comparison with ‘affect circuitry’*

In the first of our follow-up contrast and conjunction analyses, we tested if the interoceptive cluster we identified fell within established ‘affect circuitry’ in the brain. To conduct this analysis, we extracted 3867 relevant foci (N=3587) from a large database of affective tasks during neuroimaging (including fMRI and PET modalities) built for a previous meta-analysis (4). The 216 studies from which we extracted foci represented a whole-brain (not ROI) analysis, and the baseline for all contrasts was a neutral emotion (a criterion for the original ‘affect circuitry’ meta-analysis (4)). For a full description of the studies in this large database, see (4).

We first performed a standard ALE meta-analysis of these data to acquire a FWE cluster-corrected map of convergence of affect-related activation ( $p < 0.05$  FWE-corrected; initial cluster-forming threshold:  $p < 0.001$ ; 1000 threshold permutations). Next, we ran a contrast/conjunction analysis comparing this map with the thresholded map representing convergent activation across interoception tasks.

The contrast/conjunction analyses sought to identify convergent or divergent clusters with a minimum volume of  $50\text{mm}^3$  ( $p = 0.05$ , 1000  $p$ -value permutations).

No convergence of activation between the affect and interoception meta-analyses was found. Instead, significant differences in both subtractive directions (disrupted interoception minus affect circuitry, and affect circuitry minus disrupted interoception) are presented in **Figure 3 (main text)** and **Table S6**.

#### 4. *Comparison with patterns of neural change following antidepressant medication*

For the comparison with patterns of neural change following antidepressant treatment, we used contrasts extracted from a previous meta-analysis of neuroimaging studies in patients with mood disorders before and after antidepressant therapy (selective serotonin reuptake inhibitor or selective noradrenaline reuptake inhibitors) (5). See **Table S7** for full sample characterisation including diagnosis, treatment, and imaging contrast.

We ran an ALE analysis on a subset of the original dataset: whole-brain results from studies in patients reporting the effects of a course of antidepressants treatment. We did not include those studies reporting results following acute antidepressant administration. When a study reported multiple post-treatment times, we included results obtained at the later date (for example, a 16 weeks scan, rather than 8 weeks). In the case of studies reporting multiple contrasts (fearful>neutral and sad>neutral), we included only the first contrast. We included results from within-subject analyses (pre- vs post-treatment), group-by-time interactions (placebo vs medication; pre- vs post-treatment), and mixed-design studies (K=24 studies total).

After performing a standard ALE meta-analysis of these data (to acquire a FWE cluster-corrected map of convergence of changes following antidepressant treatment), we ran a conjunction analysis with the equivalent map from our differential interoception analysis.

We first ran an ALE meta-analysis of antidepressant change (again thresholded at a cluster-level family-wise- error (FWE)-corrected threshold of  $p < 0.05$  (cluster-forming threshold at voxel-level  $p < 0.001$ ; 1000 threshold permutations). Next, we ran a conjunction/contrasts analysis with the cluster-corrected map of convergence across interoceptive task. This conjunction/contrast analysis tested for clusters with minimum volume of  $50\text{mm}^3$  ( $p = 0.05$ , 1000  $p$ -value permutations).

For completeness, although no significant convergence was found, significant differences between antidepressant changes and interoceptive disruptions, found in both subtractive directions, are presented in **Figure 4** (main text) and **Table S8**.

##### 5. *Comparison with patterns of neural change following psychological therapy*

For the comparison with patterns of neural change following psychological therapy, we used contrasts extracted from a previous meta-analysis of neuroimaging studies in patients with various affective disorders before and after a course of psychotherapy (6). See **Table S9** for full sample characterisation including diagnosis, treatment, and imaging contrast.

Psychological interventions included mindfulness therapies, behavioural therapy, cognitive behavioural therapy, eye-movement displacement therapy, eclectic psychotherapy, exposure and restructuring, cognitive trauma therapy, affective bias modification-enhanced CBT, and psychodynamic therapy. We included in our analysis all studies reporting at least one coordinate from the original meta-analysis ( $K=17$ ) (note ALE analysis does not incorporate studies with no findings).

As in the antidepressant comparison, we performed a standard ALE meta-analysis of these data to acquire a FWE cluster-corrected map of convergence of psychological treatment mechanisms activation. We then ran a conjunction analysis with the equivalent map from our disrupted interoception analysis.

Again, the psychological therapy change meta-analysis was thresholded at a cluster-level family-wise- error (FWE)-corrected threshold of  $p < 0.05$  (cluster-forming threshold at voxel-level  $p < 0.001$ ; 1000 threshold permutations). The subsequent conjunction/contrast analysis tested for clusters with a minimum volume of  $50\text{mm}^3$  ( $p = 0.05$ , 1000  $p$ -value permutations). Neither convergence nor significant differences were found. For completeness, see **Table S10** for results contrasting uncorrected ALE maps thresholded at  $p < 0.001$ ).

**Table S1. All included studies in transdiagnostic neuroimaging meta-analysis (K=33, N=1236)**

| First author               | Year | Domain                  | Contrast                                      | Clinical category | N (clinical) | N (controls) | Medication (1=yes) | Verbal access (1=yes) |
|----------------------------|------|-------------------------|-----------------------------------------------|-------------------|--------------|--------------|--------------------|-----------------------|
| Avery (7)                  | 2014 | interoceptive attention | heartbeat attention > exteroceptive attention | MDD               | 20           | 20           | 0                  | 1                     |
| Bar (8)                    | 2007 | pain                    | thermal pain > baseline                       | MDD               | 13           | 13           | 0                  | 0                     |
| Berk (9)                   | 2015 | breathing load          | breathing load > baseline                     | SUD               | 15           | 18           | 0                  | 0                     |
| Berner (10)                | 2018 | breathing load          | anticipation* breathing load*post-load        | rAN               | 17           | 25           | 0                  | 0                     |
| Berner (11)                | 2019 | breathing load          | anticipation* breathing load*post-load        | rBN               | 25           | 24           | 0                  | 0                     |
| Bischoff-Grethe (12)       | 2018 | affective touch         | soft touch > baseline                         | rAN               | 18           | 26           | 0                  | 0                     |
| Coletta (13)               | 2009 | hunger                  | fasted>fed* food>objects                      | Bingeing          | 10           | 9            | 0                  | 0                     |
| Cui (14)                   | 2016 | heartbeat counting      | heartbeat counting > tone counting            | GAD               | 32           | 30           | 0                  | 0                     |
| Davidovic (15)             | 2018 | affective touch         | gentle touch> static skin indentation         | AN                | 25           | 25           | 1                  | 0                     |
| de la Fuente-Sandoval (16) | 2010 | pain                    | thermal pain > thermal non-pain               | Schizophrenia     | 12           | 13           | 0                  | 0                     |
| Elman (17)                 | 2018 | pain                    | thermal pain> thermal non-pain                | PTSD              | 12           | 12           | 1                  | 0                     |
| Geuze (18)                 | 2007 | pain                    | thermal pain > baseline                       | PTSD              | 12           | 12           | 0                  | 0                     |
| Haase (19)                 | 2016 | breathing load          | breathing load > anticipation                 | SR                | 16           | 18           | 0                  | 0                     |
| Han (20)                   | 2018 | pain                    | pain > baseline                               | BD                | 10           | 10           | 1                  | 0                     |
| Kaye (21)                  | 2020 | hunger                  | hungry>sated * sucrose>water                  | rAN               | 26           | 22           | 0                  | 0                     |
| Kerr (22)                  | 2016 | interoceptive attention | interoceptive > exteroceptive attention       | AN                | 15           | 15           | 0                  | 1                     |
| Linnman (23)               | 2013 | pain                    | aversive shock > baseline                     | Schizophrenia     | 15           | 13           | 1                  | 0                     |
| May (24)                   | 2013 | affective touch         | gentle touch > skin indentation               | SUD               | 25           | 17           | 0                  | 0                     |
| May (25)                   | 2020 | breathing load          | breathing load > baseline                     | SUD               | 13           | 34           | 0                  | 0                     |
| McIntosh (26)              | 2020 | breath hold             | breath hold > baseline                        | PD                | 21           | 21           | 0                  | 0                     |
| Migliorini (27)            | 2013 | affective touch         | soft touch > baseline                         | SUD               | 15           | 17           | 0                  | 0                     |
| Pfleiderer (28)            | 2014 | heartbeat counting      | heartbeat counting> tone counting             | Anxiety           | 24           | 24           | 0                  | 0                     |
| Santel (29)                | 2006 | hunger                  | hungry>sated* food>nonfood                    | AN                | 13           | 10           | 1                  | 0                     |
| Stewart (30)               | 2014 | breathing load          | breathing load > baseline                     | SUD               | 20           | 22           | NR                 | 0                     |
| Stewart (31)               | 2015 | affective touch         | soft touch > no touch                         | PSU               | 18           | 15           | 0                  | 0                     |
| Stewart (32)               | 2013 | breathing load          | breathing load > baseline                     | PSU               | 18           | 15           | 0                  | 0                     |

|               |      |                         |                                           |     |    |    |   |   |
|---------------|------|-------------------------|-------------------------------------------|-----|----|----|---|---|
| Stewart (33)  | 2019 | interoceptive attention | interoceptive > exteroceptive attention   | SUD | 60 | 30 | 1 | 1 |
| Stewart (34)  | 2015 | breathing load          | anticipation* breathing load*post-load    | PSU | 19 | 21 | 0 | 0 |
| Stopyra (35)  | 2020 | hunger                  | hunger>satiety* viewing>distraction       | AN  | 25 | 25 | 1 | 0 |
| Strigo (36)   | 2013 | pain                    | thermal pain>thermal non-pain             | rAN | 12 | 10 | 0 | 0 |
| Strigo (37)   | 2008 | pain                    | thermal pain>thermal non-pain             | MDD | 15 | 15 | 0 | 0 |
| Vocks (38)    | 2011 | hunger                  | hunger >satiety* drinking chocolate>water | AN  | 12 | 12 | 1 | 0 |
| Wierenga (39) | 2015 | hunger                  | hunger>satiety* decision-making           | rAN | 23 | 17 | 0 | 1 |

Interaction effects indicated with \*. MDD=Major depressive disorder, AN=anorexia nervosa, rAN=recovered anorexia nervosa, , BD=bipolar disorder, rBN=recovered bulimia nervosa, GAD=generalised anxiety disorder, PD=panic disorder, PSU=problem substance use, PTSD=post-traumatic stress disorder, SR= stress resilience, SUD=substance use disorder, NR=Not reported.

**Table S2. Cluster-corrected results: transdiagnostic disrupted interoceptive activation (FWE cluster-corrected)**

*Including all participants (K=33)*

| Region   | MNI coordinates |    |    | Volume (mm <sup>3</sup> ) | Z    | P         |
|----------|-----------------|----|----|---------------------------|------|-----------|
|          | x               | y  | z  |                           |      |           |
| L insula | -36             | -2 | 14 | 928                       | 4.47 | 0.0000038 |

*Including only adults (K=27)*

|          |     |    |    |      |      |           |
|----------|-----|----|----|------|------|-----------|
| L insula | -36 | -2 | 14 | 1088 | 4.58 | 0.0000024 |
|----------|-----|----|----|------|------|-----------|

*Including only affective and stress-related disorders (K=9)*

|                   |     |     |     |     |      |            |
|-------------------|-----|-----|-----|-----|------|------------|
| L insula          | -36 | -2  | 14  | 784 | 5.08 | 0.00000024 |
| L parahipp. gyrus | -20 | -18 | -16 | 784 | 5.46 | 0.00000019 |

Thresholded at  $p < 0.05$ , FWE cluster-corrected (cluster-forming threshold:  $p < 0.001$  uncorrected). MNI=Montreal Neurological Institute; L=left; parahipp.=parahippocampal

**Table S3. Uncorrected results: transdiagnostic disrupted interoceptive activation (across all participants: K=33; N=1236)**

| Region       | MNI coordinates |     |     | Volume (mm <sup>3</sup> ) | Z    | P          |
|--------------|-----------------|-----|-----|---------------------------|------|------------|
|              | x               | y   | z   |                           |      |            |
| L insula     | -36             | -2  | 14  | 888                       | 4.44 | 0.00000458 |
|              | -42             | -2  | 10  |                           | 4.06 | 0.0000245  |
| L perirhinal | -20             | -18 | -16 | 624                       | 4.86 | 0.00000059 |
| R MFG        | -42             | 18  | 28  | 264                       | 3.98 | 0.0000346  |
| L cerebellum | -2              | -40 | -12 | 232                       | 3.64 | 0.000137   |
| R claustrum  | 32              | -6  | 14  | 232                       | 3.73 | 0.0000975  |
| L cerebellum | -36             | -66 | -36 | 184                       | 3.63 | 0.000144   |
| MFG          | -30             | 36  | 42  | 184                       | 3.84 | 0.0000611  |
| IFG          | 48              | 46  | 0   | 136                       | 3.65 | 0.000131   |
| L insula     | -38             | -24 | 22  | 96                        | 3.44 | 0.000289   |
| L cerebellum | -4              | -38 | -34 | 88                        | 3.71 | 0.000104   |
| L sgACC      | -12             | 26  | -22 | 88                        | 3.47 | 0.000256   |
| R DLPFC      | 26              | 48  | 22  | 88                        | 3.55 | 0.000194   |
| R Insula     | 44              | -2  | 12  | 80                        | 3.29 | 0.000502   |
| L cerebellum | 0               | -60 | -8  | 64                        | 3.45 | 0.000285   |
| R Insula     | 48              | -4  | -4  | 56                        | 3.25 | 0.000585   |

Thresholded at  $p < 0.001$ , uncorrected, minimum volume: 50mm<sup>3</sup>. L=left; R=right; MNI=Montreal Neurological Institute; MFG=middle frontal gyrus; IFG=inferior frontal gyrus; sgACC=subgenual anterior cingulate cortex; DLPFC=dorsolateral prefrontal cortex.

**Table S4. Uncorrected results: exploratory analysis of hyper- and hypo-activation**

*Patient hyper-activation (Patients > Controls) (K=20)*

| Region             | MNI coordinates |     |     | Volume (mm <sup>3</sup> ) | Z    | P          |
|--------------------|-----------------|-----|-----|---------------------------|------|------------|
|                    | x               | y   | z   |                           |      |            |
| L perirhinal       | -20             | -18 | -16 | 688                       | 5.12 | 0.00000015 |
| R putamen          | 32              | -6  | 14  | 488                       | 4.22 | 0.0000123  |
| R SFG              | 26              | 48  | 22  | 320                       | 4.06 | 0.0000251  |
| R IFG              | 48              | 46  | 0   | 312                       | 4.01 | 0.0000305  |
| L MFG              | -44             | 18  | 28  | 288                       | 4.01 | 0.0000303  |
| L precentral gyrus | -50             | -2  | 32  | 264                       | 3.81 | 0.0000685  |
| L MFG              | -30             | 36  | 44  | 248                       | 3.9  | 0.0000476  |
| R Insula           | 50              | -6  | -6  | 232                       | 3.7  | 0.000109   |
| Culmen             | 0               | -60 | -8  | 200                       | 3.86 | 0.0000575  |
| R DLPFC            | 38              | 34  | 18  | 200                       | 3.52 | 0.000218   |
| R precentral gyrus | 62              | -4  | 36  | 144                       | 3.34 | 0.00042    |
|                    | 58              | 0   | 36  |                           | 3.33 | 0.000439   |
| R amygdala         | 28              | 2   | -18 | 112                       | 3.35 | 0.000398   |
| R thalamus         | -8              | 32  | 26  | 112                       | 3.47 | 0.000259   |
| R putamen          | 12              | -18 | 12  | 104                       | 3.34 | 0.000425   |
| L globus pallidus  | 32              | -6  | -10 | 80                        | 3.34 | 0.000413   |

*Patient hypoactivation (Controls>Patients) (K=21)*

| Region                  | MNI coordinates |     |     | Volume (mm <sup>3</sup> ) | Z    | P         |
|-------------------------|-----------------|-----|-----|---------------------------|------|-----------|
|                         | x               | y   | z   |                           |      |           |
| Left insula             | -36             | -4  | 14  | 567                       | 4.47 | 0.000004  |
| Right insula            | 46              | -2  | 12  | 560                       | 3.97 | 0.0000353 |
| Left precuneus          | -34             | -72 | 46  | 312                       | 4.00 | 0.0000322 |
| Left postcentral gyrus  | -60             | -12 | 16  | 264                       | 3.72 | 0.000102  |
| Left cingulate gyrus    | -4              | -4  | 48  | 264                       | 3.76 | 0.0000858 |
| Right precentral gyrus  | 60              | -6  | 24  | 264                       | 3.65 | 0.00013   |
| Right subcallosal gyrus | 20              | 16  | -20 | 232                       | 3.36 | 0.000388  |



|                |    |     |     |     |      |          |
|----------------|----|-----|-----|-----|------|----------|
| Right putamen  | 24 | 20  | -14 | 104 | 3.25 | 0.000587 |
| Right amygdala | 22 | -4  | -16 | 96  | 3.38 | 0.000361 |
| Left culmen    | -4 | -40 | -14 | 64  | 3.19 | 0.000713 |

Thresholded at  $p < 0.001$  uncorrected, minimum volume:  $50\text{mm}^3$ . R=right, L=left, MNI=Montreal Neurological Institute; SFG=superior frontal gyrus, IFG=inferior frontal gyrus, MFG=middle frontal gyrus DLPFC=dorsolateral prefrontal cortex.

**Table S5. Uncorrected results: exploratory analysis of disorder subgroups**

| <i>Affective and stress-related disorders (K=9)</i> |                 |     |     |                           |      |            |
|-----------------------------------------------------|-----------------|-----|-----|---------------------------|------|------------|
| Region                                              | MNI coordinates |     |     | Volume (mm <sup>3</sup> ) | Z    | P          |
|                                                     | x               | y   | z   |                           |      |            |
| L parahipp. gyrus                                   | -20             | -18 | -16 | 784                       | 5.46 | 0.00000002 |
| L insula                                            | -36             | -2  | 14  | 784                       | 5.08 | 0.0000002  |
| R parahipp. gyrus                                   | 26              | -2  | -20 | 528                       | 3.76 | 0.00008    |
| R putamen                                           | 24              | 18  | 8   | 456                       | 3.92 | 0.00004    |
| R anterior cingulate                                | 6               | 44  | -4  | 272                       | 3.86 | 0.00006    |
| R putamen                                           | 32              | -6  | -10 | 216                       | 3.61 | 0.0002     |
| R IFG                                               | 28              | 30  | -20 | 160                       | 3.54 | 0.0002     |
| L IFG                                               | -50             | 40  | -4  | 136                       | 3.41 | 0.0003     |
| L precentral gyrus                                  | -48             | -2  | 32  | 88                        | 3.39 | 0.0003     |
| <i>Eating disorders (K=13)</i>                      |                 |     |     |                           |      |            |
| Region                                              | MNI coordinates |     |     | Volume (mm <sup>3</sup> ) | Z    | P          |
|                                                     | x               | y   | z   |                           |      |            |
| L cingulate                                         | -2              | -2  | 48  | 400                       | 3.87 | 0.00006    |
| L MFG                                               | -43             | 18  | 28  | 352                       | 4.14 | 0.00002    |
| L precentral gyrus                                  | -54             | -4  | 36  | 280                       | 3.89 | 0.00005    |
| R thalamus                                          | 12              | -18 | 14  | 160                       | 3.49 | 0.0002     |
| R putamen                                           | 34              | -20 | 12  | 160                       | 3.52 | 0.0002     |
| L SFG                                               | -24             | 14  | 60  | 152                       | 3.39 | 0.0004     |
| L caudate                                           | -20             | 8   | 58  | 144                       | 3.22 | 0.0006     |
| L MFG                                               | -18             | 16  | 14  | 120                       | 3.43 | 0.0003     |
| R precuneus                                         | -30             | 38  | 42  | 88                        | 3.36 | 0.0004     |
| R IFG                                               | 6               | -48 | 58  | 80                        | 3.29 | 0.0005     |
| R cingulate                                         | 42              | 52  | 0   | 72                        | 3.34 | 0.0004     |
| R IFG                                               | 10              | -20 | 30  | 72                        | 3.33 | 0.0004     |
| <i>Substance abuse disorders (K=9)</i>              |                 |     |     |                           |      |            |
| Region                                              | MNI coordinates |     |     | Volume (mm <sup>3</sup> ) | Z    | P          |
|                                                     | x               | y   | z   |                           |      |            |
| L postcentral gyrus                                 | -60             | -14 | 16  | 168                       | 3.69 | 0.0001     |

|             |     |     |     |    |      |        |
|-------------|-----|-----|-----|----|------|--------|
|             | -58 | -22 | 16  |    | 3.48 | 0.0002 |
| L caudate   | -2  | 4   | 12  | 80 | 3.61 | 0.0002 |
| R insula    | 36  | -4  | 14  | 64 | 3.35 | 0.0004 |
| L fusiform  | -38 | -78 | -12 | 56 | 3.48 | 0.0003 |
| R precuneus | 8   | -74 | 56  | 56 | 3.53 | 0.0002 |

Thresholded at  $p < 0.001$  uncorrected, minimum volume:  $50\text{mm}^3$ . R=right, L=left, MNI=Montreal Neurological Institute; SFG=superior frontal gyrus, IFG=inferior frontal gyrus, MFG=middle frontal gyrus; parahipp=parahippocampal.

**Table S6. Cluster-corrected results: significant differences between disrupted interoception and affect circuitry**

| <i>Contrast: Disrupted interoception minus affect circuitry</i> |                 |       |       |                           |      |        |
|-----------------------------------------------------------------|-----------------|-------|-------|---------------------------|------|--------|
| Region                                                          | MNI coordinates |       |       | Volume (mm <sup>3</sup> ) | Z    | P      |
|                                                                 | x               | y     | z     |                           |      |        |
| L insula                                                        | -34             | -4    | 16    | 872                       | 3.29 | <0.001 |
| L entorhinal                                                    | -20             | -18   | -20   | 272                       | 2.75 | 0.003  |
| <i>Contrast: Affect circuitry minus disrupted interoception</i> |                 |       |       |                           |      |        |
| L claustrum/Insula                                              | -27             | 13.3  | -10.8 | 30064                     | 3.29 | <0.001 |
|                                                                 | -33.7           | 25.7  | -7.7  |                           | 3.29 | <0.001 |
|                                                                 | -16             | -34   | -2    |                           | 2.75 | 0.003  |
|                                                                 | -20             | -33   | 0     |                           | 2.65 | 0.004  |
|                                                                 | 18              | 6     | -12   |                           | 2.58 | 0.005  |
|                                                                 | 11.3            | -3.3  | -20.7 |                           | 2.01 | 0.022  |
|                                                                 | 14.4            | -4.4  | -18.8 |                           | 1.67 | 0.047  |
|                                                                 | 16              | 1     | -21   |                           | 1.73 | 0.042  |
|                                                                 | -48             | 18    | 14    |                           | 2.14 | 0.016  |
|                                                                 | -52             | 20    | 12    |                           | 2.12 | 0.017  |
|                                                                 | -20             | -6    | -10   |                           | 1.88 | 0.03   |
| R cerebellum                                                    | 40.4            | -61.8 | -15   | 8464                      | 3.29 | <0.001 |
|                                                                 | 46.8            | -66.6 | 7     |                           | 3.09 | 0.001  |
|                                                                 | 43.7            | -67.1 | 1.1   |                           | 2.20 | 0.014  |
|                                                                 | 44              | -84   | -6    |                           | 2.65 | 0.004  |
|                                                                 | 44              | -78   | -3    |                           | 2.33 | 0.01   |
|                                                                 | 48              | -84   | -9    |                           | 2.51 | 0.006  |
|                                                                 | 42              | -78   | -2    |                           | 2.46 | 0.007  |
| L MTG                                                           | -53.5           | -62.5 | 10.5  | 4096                      | 2.88 | 0.002  |
|                                                                 | -46.7           | -80.7 | 7.3   |                           | 2.37 | 0.009  |
|                                                                 | -45.5           | -78.5 | 13.5  |                           | 2.46 | 0.007  |
|                                                                 | -44             | -82   | 6     |                           | 2.46 | 0.007  |
| SFG                                                             | 0               | 57.5  | 26.9  | 3880                      | 3.29 | <0.001 |
|                                                                 | 0               | 63    | 14    |                           | 2.51 | 0.006  |
| R IFG                                                           | 56              | 24    | -6    | 2944                      | 3.29 | <0.001 |

|                    |      |       |      |      |      |        |
|--------------------|------|-------|------|------|------|--------|
|                    | 57.3 | 31.3  | -2.7 |      | 3.09 | 0.001  |
|                    | 52.5 | 29.5  | -9.5 |      | 2.88 | 0.002  |
|                    | 44.7 | 32.7  | -12  |      | 2.58 | 0.005  |
| L fusiform         | -44  | -53   | -13  | 2296 | 2.33 | 0.01   |
|                    | -44  | -52   | -16  |      | 2.51 | 0.006  |
| R STG              | 51.7 | -28.9 | 1.1  | 1392 | 3.29 | <0.001 |
|                    | 55   | -36   | 7    |      | 2.88 | 0.002  |
|                    | 66   | -42   | 8    |      | 2.14 | 0.016  |
| R cingulate        | 6.7  | 20    | 36.7 | 1128 | 2.88 | 0.002  |
|                    | 0    | 19    | 36   |      | 2.75 | 0.003  |
| R IFG              | 48   | 12    | 22   | 888  | 2.88 | 0.002  |
|                    | 43.6 | 10.4  | 32   |      | 2.41 | 0.008  |
| R precentral gyrus | 42   | 8     | 30   | 360  | 2.46 | 0.007  |
|                    | 44   | 8     | 30   |      | 2.37 | 0.009  |
| R IFG              | 52   | 12    | 22   | 200  | 2.65 | 0.004  |
|                    | 52   | 18    | 32   |      | 2.46 | 0.007  |
| R IFG              | 54   | 15    | 27   | 160  | 2.05 | 0.02   |
| L cingulate        | -4   | 18    | 36   | 152  | 2.33 | 0.01   |
| R cingulate        | 10   | 22    | 36   | 144  | 2.65 | 0.004  |
| R cingulate        | 42   | 4     | 34   | 120  | 2.17 | 0.015  |
| R precentral gyrus | 44   | 4     | 30   |      | 2.01 | 0.022  |
| R MFG              | 56   | 18    | 32   | 72   | 2.12 | 0.017  |
| R IFG              | 52   | 10    | 22   | 64   | 2.41 | 0.008  |
| L cingulate        | -2   | 20    | 34   | 64   | 2.33 | 0.01   |
| R MFG              | 58   | 18    | 32   | 56   | 1.98 | 0.024  |

Initial ALE analyses for both analyses were thresholded at  $p < 0.05$ , FWE cluster-corrected (cluster-forming threshold:  $p < 0.001$  uncorrected); subsequent conjunction/contrast analysis thresholded at  $p < 0.05$ , 1000  $p$  value permutations, minimum cluster size =  $50\text{m}^3$ . L=left; R=right; MNI=Montreal Neurological Institute; MTG=middle temporal gyrus; MFG=middle frontal gyrus; IFG=inferior frontal gyrus; STG=superior temporal gyrus; SFG=superior frontal gyrus.

**Table S7. Details of studies included in antidepressant therapy versus interoception contrast analysis**

| First author    | Year | Diagnosis      | Intervention | N patients | Task    | Contrast                  | Imaging |
|-----------------|------|----------------|--------------|------------|---------|---------------------------|---------|
| Benedetti(40)   | 2009 | MDD            | SNRI         | 8          | emotion | negative>positive         | fMRI    |
| Davidson(41)    | 2003 | MDD            | SNRI         | 12         | emotion | negative>neutral          | fMRI    |
| Frodl(42)       | 2011 | MDD            | SNRI         | 11         | emotion | sad>shapes                | fMRI    |
| Kalin(43)       | 1997 | MDD            | SNRI         | 2          | emotion | negative>neutral          | fMRI    |
| Lopez-Sola(44)  | 2010 | MDD            | SNRI         | 13         | pain    | painful>nonpainful        | fMRI    |
| Robertson(45)   | 2007 | MDD            | SNRI         | 10         | emotion | sad>neutral               | fMRI    |
| Schaefer(46)    | 2006 | MDD            | SNRI         | 9          | social  | social interaction>other  | fMRI    |
| Anand(47)       | 2007 | MDD            | SSRI         | 12         | emotion | negative emotion>fixation | fMRI    |
| Arnone(48)      | 2012 | social phobia  | SSRI         | 30         | emotion | sad>neutral               | fMRI    |
| Cornelius(49)   | 2010 | MDD            | SSRI         | 6          | emotion | fear>shape                | fMRI    |
| Fales(50)       | 2009 | MDD            | SSRI         | 23         | emotion | fear>neutral              | fMRI    |
| Fu(51)          | 2004 | MDD            | SSRI         | 13         | emotion | sad>fixation              | fMRI    |
| Godlewska(52)   | 2012 | MDD            | SSRI         | 42         | emotion | fear>happy                | fMRI    |
| Hoehn-Saric(53) | 2004 | GAD            | SSRI         | 6          | emotion | worry>neutral             | fMRI    |
| Maslowsky(54)   | 2010 | GAD            | SSRI         | 7          | emotion | angry>fixation            | fMRI    |
| Phan(55)        | 2012 | social phobia  | SSRI         | 21         | emotion | fear>happy                | fMRI    |
| Rosenblau(56)   | 2012 | MDD            | SSRI         | 12         | emotion | negative>positive         | fMRI    |
| Ruhe(57)        | 2012 | MDD            | SSRI         | 16         | emotion | fear>scrambled faces      | fMRI    |
| Stoy(58)        | 2012 | MDD            | SSRI         | 15         | reward  | loss>neutral              | fMRI    |
| Tao(59)         | 2012 | adolescent MDD | SSRI         | 19         | emotion | fear>neutral              | fMRI    |
| Victor(60)      | 2010 | MDD            | SSRI         | 10         | emotion | sad>neutral               | fMRI    |
| Wang(61)        | 2012 | MDD            | SSRI         | 18         | emotion | negative>neutral          | fMRI    |
| Samson(62)      | 2011 | MDD            | SSRI/SNRI    | 10         | emotion | sad>baseline              | fMRI    |

*MDD=Major depressive disorder; GAD=generalized anxiety disorder; fMRI=functional magnetic resonance imaging; SSRI=selective serotonin reuptake inhibitor; SNRI=selective noradrenaline reuptake inhibitor.*

**Table S8. Cluster-corrected results: contrast between disrupted interoception and neural changes following treatment with antidepressant medication (cluster corrected,  $p < 0.05$ )**

*Contrast: Disrupted interoception minus antidepressant mechanisms*

| Region   | MNI coordinates |   |    | Volume (mm <sup>3</sup> ) | Z    | P    |
|----------|-----------------|---|----|---------------------------|------|------|
|          | x               | y | z  |                           |      |      |
| L insula | -42             | 2 | 10 | 408                       | 2.33 | 0.01 |

*Contrast: Antidepressant mechanisms minus disrupted interoception*

| Region      | MNI coordinates |    |       | Volume (mm <sup>3</sup> ) | Z    | P     |
|-------------|-----------------|----|-------|---------------------------|------|-------|
|             | x               | y  | z     |                           |      |       |
| L medial GP | -15             | -6 | -10.5 | 408                       | 2.23 | 0.013 |
| L amygdala  | 34              | -6 | -22   | 256                       | 1.87 | 0.031 |
|             |                 | -4 | -22   |                           | 1.85 | 0.032 |
|             | 33              | 0  | -24   |                           | 1.84 | 0.033 |
| R amygdala  | -22             | 2  | -22   | 256                       | 2.23 | 0.013 |

Initial ALE maps for both analyses were thresholded at  $p < 0.05$  FWE cluster-corrected (cluster-forming threshold:  $p < 0.001$  uncorrected); subsequent conjunction/contrast analysis thresholded at  $p < 0.05$ , 1000  $p$  value permutations. L=left; R=right; MNI=Montreal Neurological Institute; GP=globus pallidus.

**Table S9. Details of studies included in psychological therapy versus interoception contrast analysis**

| First author   | Year | Diagnosis     | Intervention | N patients | Task    | Contrast                         | Imaging |
|----------------|------|---------------|--------------|------------|---------|----------------------------------|---------|
| Mansson(63)    | 2013 | SAD           | ABM          | 13         | emotion | disgust>neutral                  | fMRI    |
| Lindauer(64)   | 2008 | PTSD          | BEP          | 10         | emotion | symptom provocation              | SPECT   |
| Yamanishi(65)  | 2009 | OCD           | BT           | 33         | resting | resting                          | SPECT   |
| Felmingham(66) | 2007 | PTSD          | CBT          | 8          | emotion | fearful>neutral                  | fMRI    |
| Furmark(67)    | 2002 | social phobia | CBT          | 6          | emotion | anxiogenic public speaking       | PET     |
| Goldapple(68)  | 2004 | MDD           | CBT          | 14         | resting | resting                          | PET     |
| Goldin(69)     | 2012 | SAD           | CBT          | 24         | emotion | negative self-referential>self   | fMRI    |
| Kircher(70)    | 2013 | PD            | CBT          | 42         | emotion | fear-conditioned>non-conditioned | fMRI    |
| Klumpp(71)     | 2013 | SAD           | CBT          | 14         | emotion | fearful>happy                    | fMRI    |
| Prasko(72)     | 2004 | PD            | CBT          | 6          | resting | resting                          | PET     |
| Sakai(73)      | 2006 | PD            | CBT          | 11         | resting | resting                          | PET     |
| Sankar(74)     | 2015 | MDD           | CBT          | 16         | emotion | negative attitudes>neutral       | fMRI    |
| Yoshimura(75)  | 2014 | MDD           | CBT          | 23         | emotion | negative self-referential>verbal | fMRI    |
| Aupperle(76)   | 2013 | PTSD          | CBT (CTT)    | 14         | emotion | negative>positive                | fMRI    |
| Mansson(77)    | 2013 | SAD           | CBT (iCBT)   | 13         | emotion | disgust>neutral                  | fMRI    |
| Goldin(78)     | 2010 | SAD           | mindfulness  | 14         | emotion | negative self-belief>fixation    | fMRI    |
| Holzel(79)     | 2013 | GAD           | mindfulness  | 15         | emotion | angry>neutral                    | fMRI    |
| Keedwell(80)   | 2009 | MDD           | variety      | 12         | emotion | sad>fixation                     | fMRI    |

MDD=Major depressive disorder, GAD=generalized anxiety disorder, PD=panic disorder, PTSD=post-traumatic stress disorder, OCD=Obsessive-compulsive disorder, SAD=social anxiety disorder; fMRI=functional magnetic resonance imaging; PET=positron emission tomography; SPECT=single photon emission tomography; CBT=cognitive behavioral therapy; iCBT=internet-based CBT; CTT=cognitive trauma therapy; BT=behavioral therapy; ABM= affective bias modification; BEP=brief eclectic psychotherapy.

**Table S10. Uncorrected results: contrast between disrupted interoception and neural changes following treatment with psychological therapy**

*Contrast: Disrupted interoception minus psychological therapy mechanisms*

| Region   | MNI coordinates |       |      | Volume (mm <sup>3</sup> ) | Z    | P     |
|----------|-----------------|-------|------|---------------------------|------|-------|
|          | x               | y     | z    |                           |      |       |
| L insula | -42             | -4    | 10   | 544                       | 2.18 | 0.015 |
|          | -46             | -2    | 12   |                           | 2.11 | 0.018 |
|          | -42             | 2     | 8    |                           | 2.07 | 0.019 |
| Culmen   | 0               | -42   | -12  | 216                       | 2.21 | 0.014 |
| L culmen | -0.8            | -59.2 | -7.2 | 88                        | 2.35 | 0.009 |

*Contrast: Psychological therapy mechanisms minus disrupted interoception*

| Region  | MNI coordinates |      |      | Volume (mm <sup>3</sup> ) | Z    | P      |
|---------|-----------------|------|------|---------------------------|------|--------|
|         | x               | y    | z    |                           |      |        |
| R DMPFC | 7               | 61.5 | 16.5 | 904                       | 2.68 | 0.0037 |
|         | 11              | 59   | 15   |                           | 2.56 | 0.0052 |

Initial ALE maps thresholded at  $p < 0.001$  uncorrected, minimum volume: 50mm<sup>3</sup>; subsequent conjunction/contrast analysis thresholded at  $p < 0.05$ , 1000 p value permutations. L=left; R=right; MNI=Montreal Neurological Institute; DMPFC=dorsomedial prefrontal cortex.



## References

1. Craig AD: How do you feel? Interoception: the sense of the physiological condition of the body. *Nature reviews neuroscience* 2002; 3:655
2. Critchley HD, Garfinkel SN: Interoception and emotion. *Current opinion in psychology* 2017; 17:7–14
3. World Health Organization: *The ICD-10 Classification of Mental and Behavioural Disorders*. 1992
4. Lindquist KA, Satpute AB, Wager TD, et al.: The brain basis of positive and negative affect: evidence from a meta-analysis of the human neuroimaging literature. *Cerebral cortex* 2016; 26:1910–1922
5. Ma Y: Neuropsychological mechanism underlying antidepressant effect: a systematic meta-analysis. *Molecular psychiatry* 2015; 20:311–319
6. Marwood L, Wise T, Perkins AM, et al.: Meta-analyses of the neural mechanisms and predictors of response to psychotherapy in depression and anxiety. *Neuroscience & Biobehavioral Reviews* 2018; 95:61–72
7. Avery JA, Drevets WC, Moseman SE, et al.: Major depressive disorder is associated with abnormal interoceptive activity and functional connectivity in the insula. *Biological psychiatry* 2014; 76:258–266
8. Bär K-J, Wagner G, Koschke M, et al.: Increased prefrontal activation during pain perception in major depression. *Biological psychiatry* 2007; 62:1281–1287
9. Berk L, Stewart JL, May AC, et al.: Under pressure: adolescent substance users show exaggerated neural processing of aversive interoceptive stimuli. *Addiction* 2015; 110:2025–2036
10. Berner LA, Simmons AN, Wierenga CE, et al.: Altered interoceptive activation before, during, and after aversive breathing load in women remitted from anorexia nervosa. *Psychological medicine* 2018; 48:142–154
11. Berner LA, Simmons AN, Wierenga CE, et al.: Altered anticipation and processing of aversive interoceptive experience among women remitted from bulimia nervosa. *Neuropsychopharmacology* 2019; 44:1265–1273
12. Bischoff-Grethe A, Wierenga CE, Berner LA, et al.: Neural hypersensitivity to pleasant touch in women remitted from anorexia nervosa. *Translational psychiatry* 2018; 8:1–13
13. Coletta M, Platek S, Mohamed FB, et al.: Brain activation in restrained and unrestrained eaters: an fMRI study. *Journal of abnormal psychology* 2009; 118:598
14. Cui H, Zhang B, Li W, et al.: Insula shows abnormal task-evoked and resting-state activity in first-episode drug-naïve generalized anxiety disorder. *Depression and Anxiety* 2020;
15. Davidovic M, Karjalainen L, Starck G, et al.: Abnormal brain processing of gentle touch in Anorexia Nervosa. *Psychiatry Research: Neuroimaging* 2018; 281:53–60

16. De la Fuente-Sandoval C, Favila R, Gómez-Martin D, et al.: Functional magnetic resonance imaging response to experimental pain in drug-free patients with schizophrenia. *Psychiatry Research: Neuroimaging* 2010; 183:99–104
17. Elman I, Upadhyay J, Langleben DD, et al.: Reward and aversion processing in patients with post-traumatic stress disorder: functional neuroimaging with visual and thermal stimuli. *Translational psychiatry* 2018; 8:1–15
18. Geuze E, Westenberg HG, Jochims A, et al.: Altered pain processing in veterans with posttraumatic stress disorder. *Archives of general psychiatry* 2007; 64:76–85
19. Haase L, Stewart JL, Youssef B, et al.: When the brain does not adequately feel the body: links between low resilience and interoception. *Biological psychology* 2016; 113:37–45
20. Han X, Liu X, Li L, et al.: Neural Activation During Tonic Pain and Interaction Between Pain and Emotion in Bipolar Disorder: An fMRI Study. *Frontiers in psychiatry* 2018; 9:555
21. Kaye WH, Wierenga CE, Bischoff-Grethe A, et al.: Neural Insensitivity to the Effects of Hunger in Women Remitted From Anorexia Nervosa. *American Journal of Psychiatry* 2020; appi-ajp
22. Kerr KL, Moseman SE, Avery JA, et al.: Altered insula activity during visceral interoception in weight-restored patients with anorexia nervosa. *Neuropsychopharmacology* 2016; 41:521
23. Linnman C, Coombs III G, Goff DC, et al.: Lack of insula reactivity to aversive stimuli in schizophrenia. *Schizophrenia research* 2013; 143:150–157
24. May AC, Stewart JL, Migliorini R, et al.: Methamphetamine dependent individuals show attenuated brain response to pleasant interoceptive stimuli. *Drug and alcohol dependence* 2013; 131:238–246
25. May AC, Jacobus J, Stewart JL, et al.: Do adolescents use substances to relieve uncomfortable sensations? A preliminary examination of negative reinforcement among adolescent cannabis and alcohol users. *Brain sciences* 2020; 10:214
26. McIntosh R, Hoshi R, Timpano K: Take my breath away: Neural activation at breath-hold differentiates individuals with panic disorder from healthy controls. *Respiratory Physiology & Neurobiology* 2020; 103427
27. Migliorini R, Stewart JL, May AC, et al.: What do you feel? Adolescent drug and alcohol users show altered brain response to pleasant interoceptive stimuli. *Drug and alcohol dependence* 2013; 133:661–668
28. Pfliegerer B, Berse T, Stroux D, et al.: Internal focus of attention in anxiety-sensitive females up-regulates amygdale activity: an fMRI study. *Journal of Neural Transmission* 2014; 121:1417–1428
29. Santel S, Baving L, Krauel K, et al.: Hunger and satiety in anorexia nervosa: fMRI during cognitive processing of food pictures. *Brain research* 2006; 1114:138–148
30. Stewart JL, May AC, Poppa T, et al.: You are the danger: attenuated insula response in methamphetamine users during aversive interoceptive decision-making. *Drug and alcohol dependence* 2014; 142:110–119

31. Stewart JL, May AC, Tapert SF, et al.: Hyperactivation to pleasant interoceptive stimuli characterizes the transition to stimulant addiction. *Drug and alcohol dependence* 2015; 154:264–270
32. Stewart JL, Parnass JM, May AC, et al.: Altered frontocingulate activation during aversive interoceptive processing in young adults transitioning to problem stimulant use. *Frontiers in systems neuroscience* 2013; 7:89
33. Stewart JL, Khalsa SS, Kuplicki R, et al.: Interoceptive attention in opioid and stimulant use disorder. *Addiction Biology* 2019; e12831
34. Stewart JL, Juavinett AL, May AC, et al.: Do you feel alright? Attenuated neural processing of aversive interoceptive stimuli in current stimulant users. *Psychophysiology* 2015; 52:249–262
35. Stopyra MA, Friederich H-C, Mönning E, et al.: The influence of homeostatic mechanisms on neural regulation of food craving in anorexia nervosa. *Psychological Medicine* 2020; 1–9
36. Strigo IA, Matthews SC, Simmons AN, et al.: Altered insula activation during pain anticipation in individuals recovered from anorexia nervosa: evidence of interoceptive dysregulation. *International Journal of Eating Disorders* 2013; 46:23–33
37. Strigo IA, Simmons AN, Matthews SC, et al.: Association of major depressive disorder with altered functional brain response during anticipation and processing of heat pain. *Archives of general psychiatry* 2008; 65:1275–1284
38. Vocks S, Herpertz S, Rosenberger C, et al.: Effects of gustatory stimulation on brain activity during hunger and satiety in females with restricting-type anorexia nervosa: an fMRI study. *Journal of psychiatric research* 2011; 45:395–403
39. Wierenga CE, Bischoff-Grethe A, Melrose AJ, et al.: Hunger does not motivate reward in women remitted from anorexia nervosa. *Biological psychiatry* 2015; 77:642–652
40. Benedetti F, Bernasconi A, Radaelli D, et al.: Changes in medial prefrontal cortex neural responses parallel successful antidepressant combination of venlafaxine and light therapy. *The International Journal of Neuropsychopharmacology* 2008; 11:97
41. Davidson RJ, Irwin W, Anderle MJ, et al.: The neural substrates of affective processing in depressed patients treated with venlafaxine. *American journal of Psychiatry* 2003; 160:64–75
42. Frodl T, Scheuerecker J, Schoepf V, et al.: Different effects of mirtazapine and venlafaxine on brain activation: an open randomized controlled fMRI study. *The Journal of clinical psychiatry* 2010; 72:448–457
43. Kalin NH, Davidson RJ, Irwin W, et al.: Functional magnetic resonance imaging studies of emotional processing in normal and depressed patients: effects of venlafaxine. *The Journal of Clinical Psychiatry* 1997;
44. López-Solà M, Pujol J, Hernández-Ribas R, et al.: Effects of duloxetine treatment on brain response to painful stimulation in major depressive disorder. *Neuropsychopharmacology* 2010; 35:2305–2317

45. Robertson B, Wang L, Diaz MT, et al.: Effect of bupropion extended release on negative emotion processing in major depressive disorder: a pilot functional magnetic resonance imaging study. *The Journal of clinical psychiatry* 2007;
46. Schaefer HS, Putnam KM, Benca RM, et al.: Event-related functional magnetic resonance imaging measures of neural activity to positive social stimuli in pre-and post-treatment depression. *Biological psychiatry* 2006; 60:974–986
47. Anand A, Li Y, Wang Y, et al.: Reciprocal effects of antidepressant treatment on activity and connectivity of the mood regulating circuit: an FMRI study. *The Journal of neuropsychiatry and clinical neurosciences* 2007; 19:274–282
48. Arnone D, McKie S, Elliott R, et al.: Increased amygdala responses to sad but not fearful faces in major depression: relation to mood state and pharmacological treatment. *American Journal of Psychiatry* 2012; 169:841–850
49. Cornelius JR, Aizenstein HJ, Hariri AR: Amygdala reactivity is inversely related to level of cannabis use in individuals with comorbid cannabis dependence and major depression. *Addictive behaviors* 2010; 35:644–646
50. Fales CL, Barch DM, Rundle MM, et al.: Antidepressant treatment normalizes hypoactivity in dorsolateral prefrontal cortex during emotional interference processing in major depression. *Journal of affective disorders* 2009; 112:206–211
51. Fu CH, Williams SC, Cleare AJ, et al.: Attenuation of the neural response to sad faces in major depression by antidepressant treatment: a prospective, event-related functional magnetic resonance imaging study. *Archives of general psychiatry* 2004; 61:877–889
52. Godlewska B, Norbury R, Selvaraj S, et al.: Short-term SSRI treatment normalises amygdala hyperactivity in depressed patients. *Psychological medicine* 2012; 42:2609–2617
53. Hoehn-Saric R, Schlund MW, Wong SH: Effects of citalopram on worry and brain activation in patients with generalized anxiety disorder. *Psychiatry Research: Neuroimaging* 2004; 131:11–21
54. Maslowsky J, Mogg K, Bradley BP, et al.: A preliminary investigation of neural correlates of treatment in adolescents with generalized anxiety disorder. *Journal of child and adolescent psychopharmacology* 2010; 20:105–111
55. Phan KL, Coccaro EF, Angstadt M, et al.: Corticolimbic brain reactivity to social signals of threat before and after sertraline treatment in generalized social phobia. *Biological Psychiatry* 2013; 73:329–336
56. Rosenblau G, Sterzer P, Stoy M, et al.: Functional neuroanatomy of emotion processing in major depressive disorder is altered after successful antidepressant therapy. *Journal of psychopharmacology* 2012; 26:1424–1433
57. Ruhé HG, Mason NS, Schene AH: Mood is indirectly related to serotonin, norepinephrine and dopamine levels in humans: a meta-analysis of monoamine depletion studies. *Molecular psychiatry* 2007; 12:331

58. Stoy M, Schlagenhaut F, Sterzer P, et al.: Hyporeactivity of ventral striatum towards incentive stimuli in unmedicated depressed patients normalizes after treatment with escitalopram. *Journal of psychopharmacology* 2012; 26:677–688
59. Tao R, Calley CS, Hart J, et al.: Brain activity in adolescent major depressive disorder before and after fluoxetine treatment. *American Journal of Psychiatry* 2012; 169:381–388
60. Victor TA, Furey ML, Fromm SJ, et al.: Relationship between amygdala responses to masked faces and mood state and treatment in major depressive disorder. *Archives of general psychiatry* 2010; 67:1128–1138
61. Wang Y, Xu C, Cao X, et al.: Effects of an antidepressant on neural correlates of emotional processing in patients with major depression. *Neuroscience letters* 2012; 527:55–59
62. Samson AC, Meisenzahl E, Scheuerecker J, et al.: Brain activation predicts treatment improvement in patients with major depressive disorder. *Journal of psychiatric research* 2011; 45:1214–1222
63. Månsson K, al et: Amygdala Changes after Cognitive Behavior Therapy and Attention Bias Modification via the Internet – an fMRI-study. 2013
64. Lindauer R, Booij J, Habraken J, et al.: Effects of psychotherapy on regional cerebral blood flow during trauma imagery in patients with post-traumatic stress disorder: A randomized clinical trial. *Psychological medicine* 2008; 38:543–54
65. Yamanishi T, Nakaaki S, Omori IM, et al.: Changes after behavior therapy among responsive and nonresponsive patients with obsessive-compulsive disorder. *Psychiatry Research: Neuroimaging* 2009; 172:242–250
66. Felmingham K, Kemp A, Williams L, et al.: Changes in Anterior Cingulate and Amygdala After Cognitive Behavior Therapy of Posttraumatic Stress Disorder. *Psychol Sci* 2007; 18:127–129
67. Furmark T, Tillfors M, Marteinsdottir I, et al.: Common Changes in Cerebral Blood Flow in Patients With Social Phobia Treated With Citalopram or Cognitive-Behavioral Therapy. *Archives of General Psychiatry* 2002; 59:425–433
68. Goldapple K, Segal Z, Garson C, et al.: Modulation of cortical-limbic pathways in major depression: treatment-specific effects of cognitive behavior therapy. *Archives of general psychiatry* 2004; 61:34–41
69. Goldin PR, Ziv M, Jazaieri H, et al.: Cognitive reappraisal self-efficacy mediates the effects of individual cognitive-behavioral therapy for social anxiety disorder. *J Consult Clin Psychol* 2012; 80:1034–1040
70. Kircher T, Arolt V, Jansen A, et al.: Effect of Cognitive-Behavioral Therapy on Neural Correlates of Fear Conditioning in Panic Disorder. *Biological Psychiatry* 2013; 73:93–101
71. Klumpp H, Fitzgerald DA, Phan KL: Neural predictors and mechanisms of cognitive behavioral therapy on threat processing in social anxiety disorder. *Progress in Neuro-Psychopharmacology and Biological Psychiatry* 2013; 45:83–91

72. Prasko J, Horacek J, Záleský R, et al.: The change of regional brain metabolism (18FDG PET) in panic disorder during the treatment with cognitive behavioral therapy or antidepressants. *Neuro endocrinology letters* 2004; 25:340–8
73. Sakai Y, Kumano H, Nishikawa M, et al.: Changes in cerebral glucose utilization in patients with panic disorder treated with cognitive–behavioral therapy. *NeuroImage* 2006; 33:218–226
74. Sankar A, Scott J, Paszkiewicz A, et al.: Neural effects of cognitive–behavioural therapy on dysfunctional attitudes in depression. *Psychological Medicine* 2015; 45:1425–1433
75. Yoshimura S, Okamoto Y, Onoda K, et al.: Cognitive behavioral therapy for depression changes medial prefrontal and ventral anterior cingulate cortex activity associated with self-referential processing. *Social Cognitive and Affective Neuroscience* 2013; 9:487–493
76. Aupperle RL, Allard CB, Simmons AN, et al.: Neural responses during emotional processing before and after cognitive trauma therapy for battered women. *Psychiatry Research: Neuroimaging* 2013; 214:48–55
77. Månsson KNT, Carlbring P, Frick A, et al.: Altered neural correlates of affective processing after internet-delivered cognitive behavior therapy for social anxiety disorder. *Psychiatry Research: Neuroimaging* 2013; 214:229–237
78. Goldin PR, Gross JJ: Effects of mindfulness-based stress reduction (MBSR) on emotion regulation in social anxiety disorder. *Emotion* 2010; 10:83–91
79. Hölzel BK, Hoge EA, Greve DN, et al.: Neural mechanisms of symptom improvements in generalized anxiety disorder following mindfulness training. *NeuroImage: Clinical* 2013; 2:448–458
80. Keedwell P, Drapier D, Surguladze S, et al.: Neural markers of symptomatic improvement during antidepressant therapy in severe depression: subgenual cingulate and visual cortical responses to sad, but not happy, facial stimuli are correlated with changes in symptom score. *Journal of Psychopharmacology* 2009; 23:775–788
